# Supplementary material
Source: PubMed Central journal article supplement (PMC1352169)

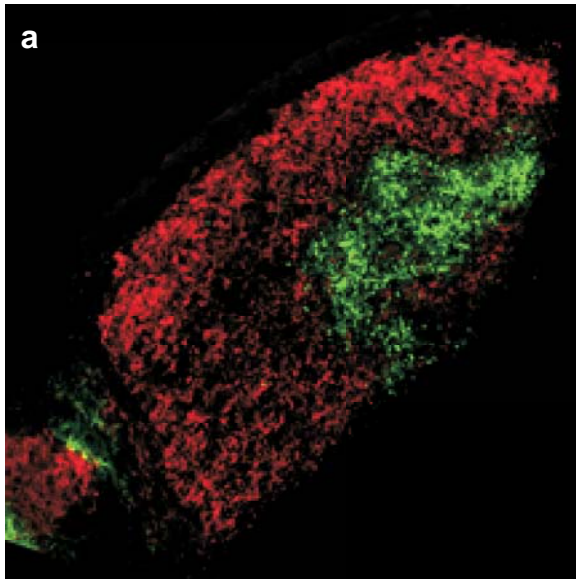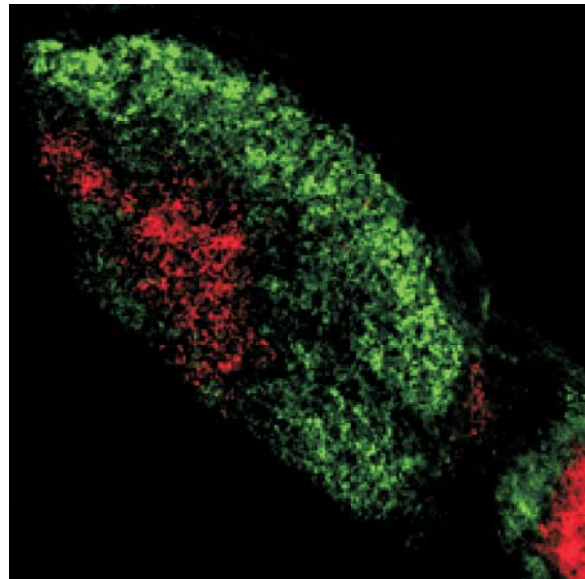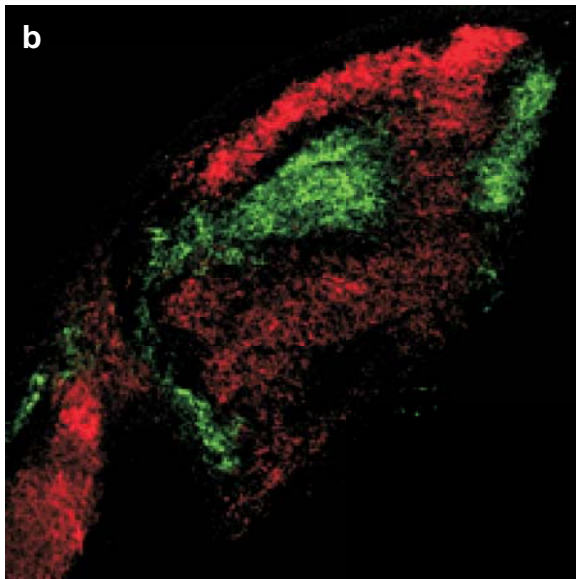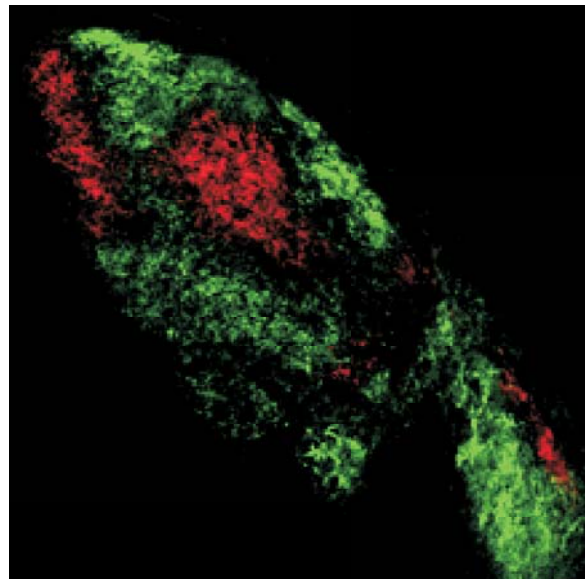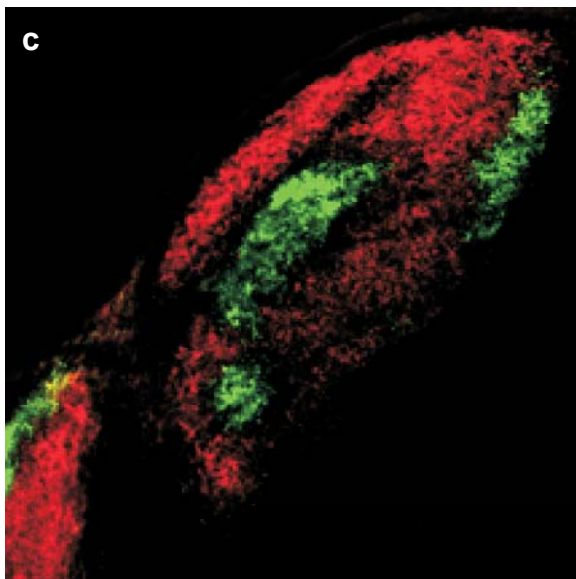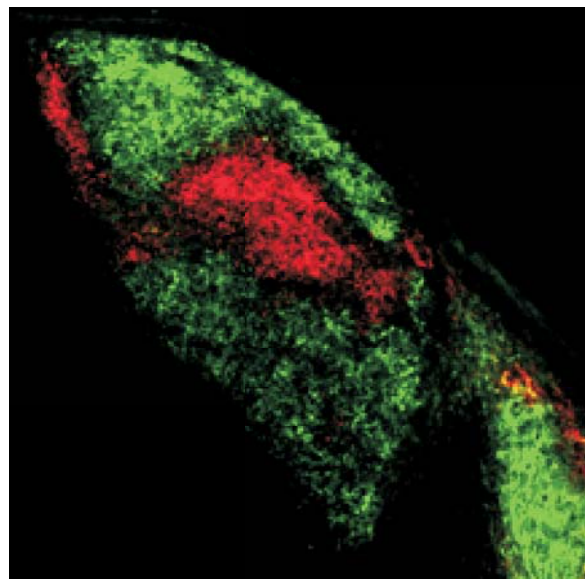

Supplement: NIHMS4845-supplement-supmat1.pdf [file NIHMS4845-supplement-supmat1.pdf]

Contralateral

Ipsilateral

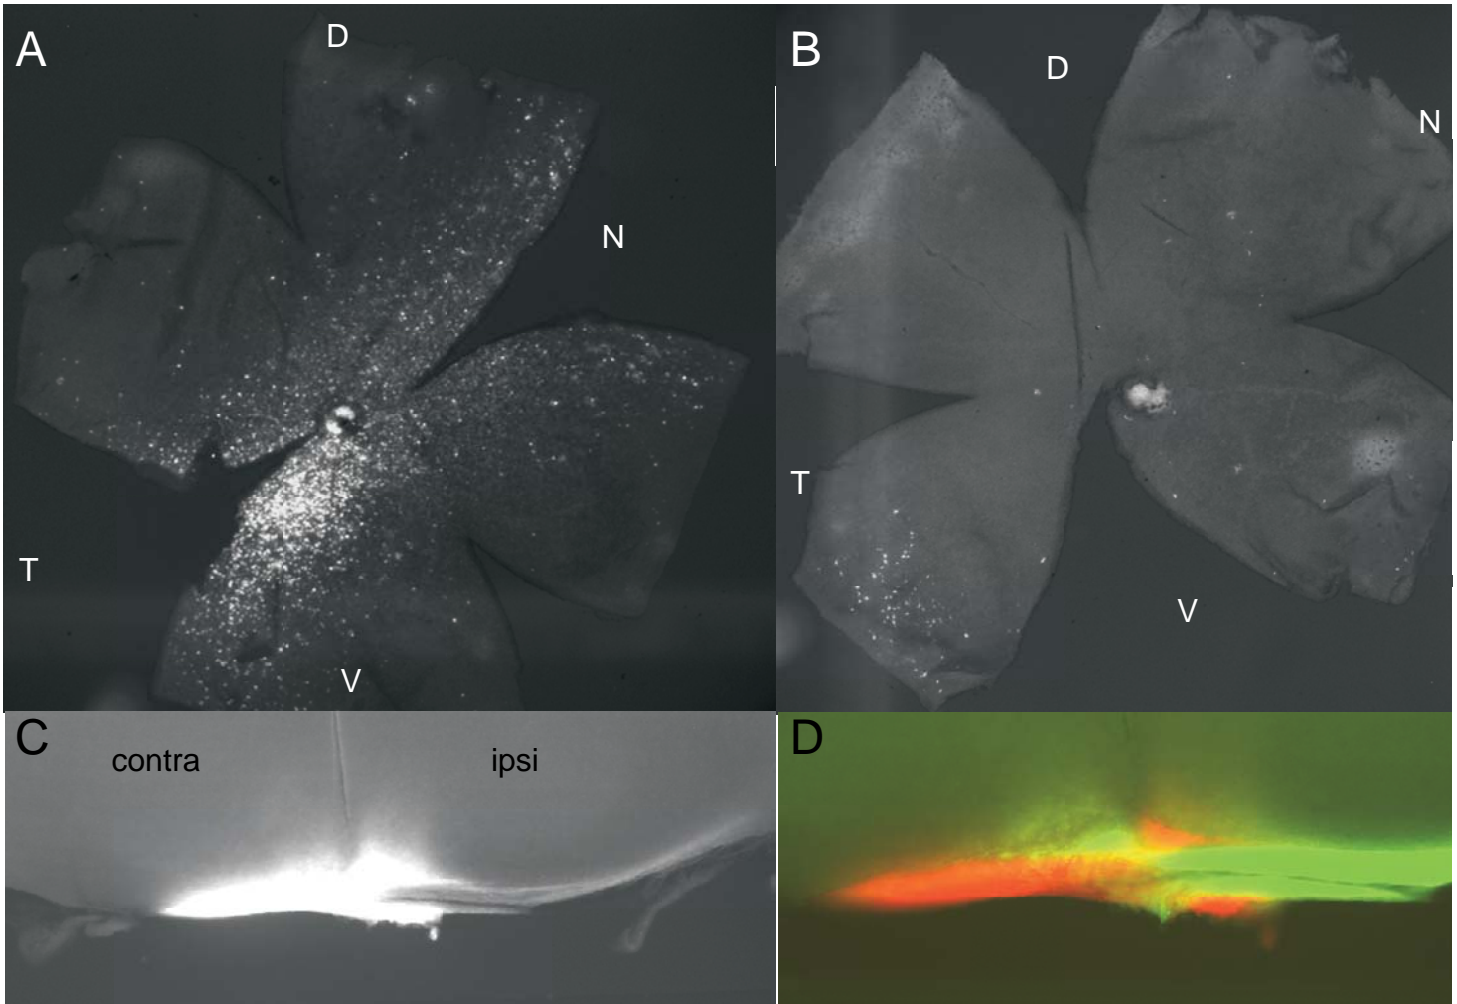

Supplement: NIHMS4845-supplement-supmat2.pdf [file NIHMS4845-supplement-supmat2.pdf]

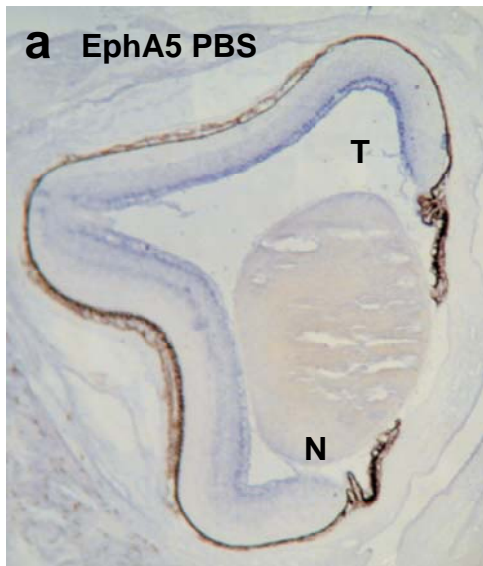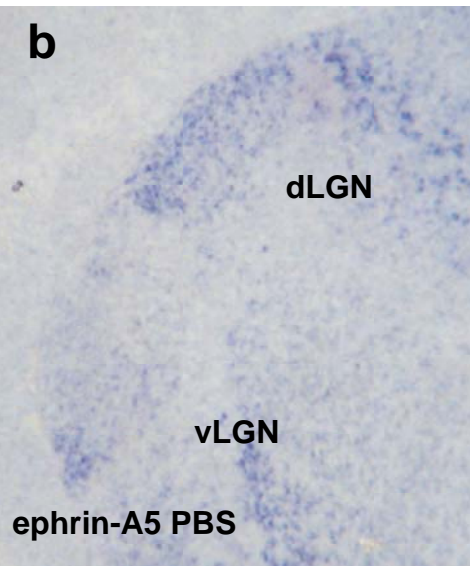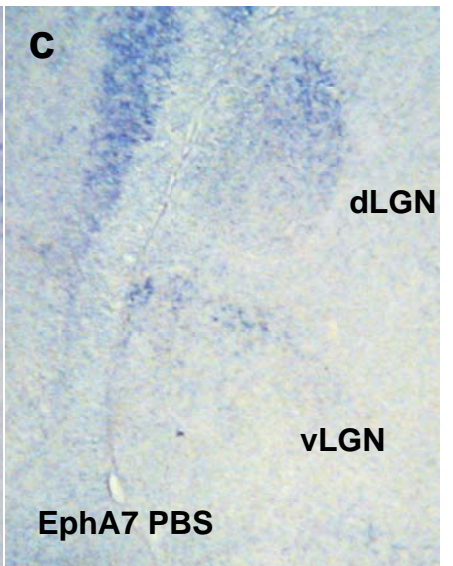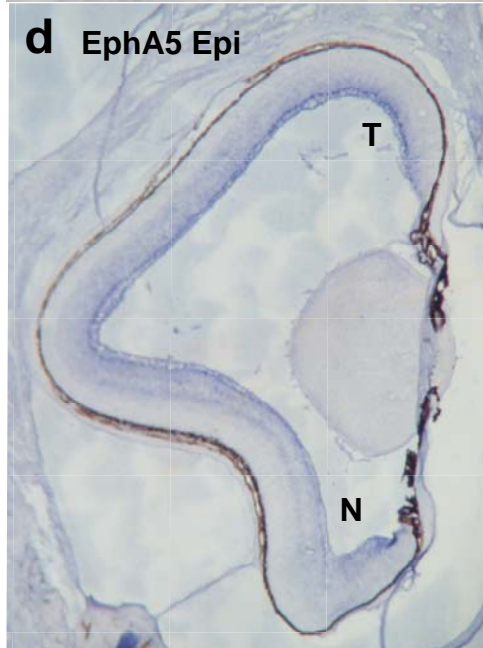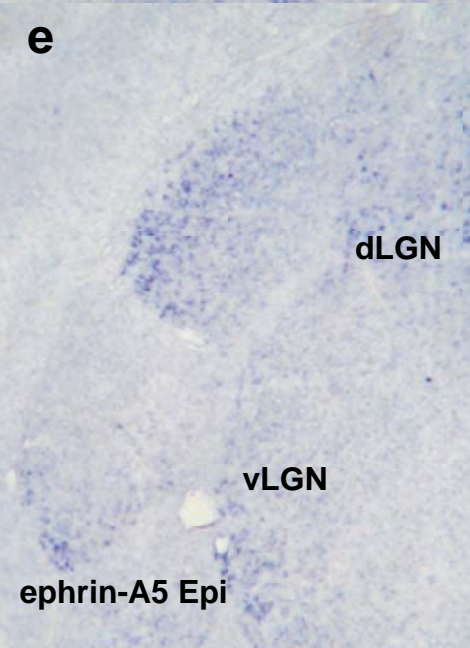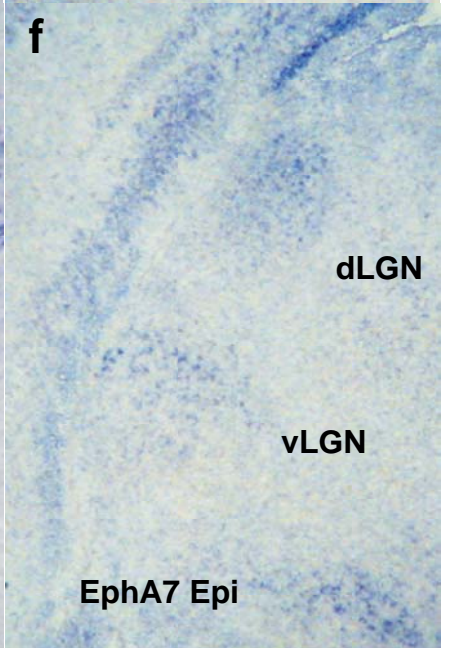

Supplement: NIHMS4845-supplement-supmat3.pdf [file NIHMS4845-supplement-supmat3.pdf]

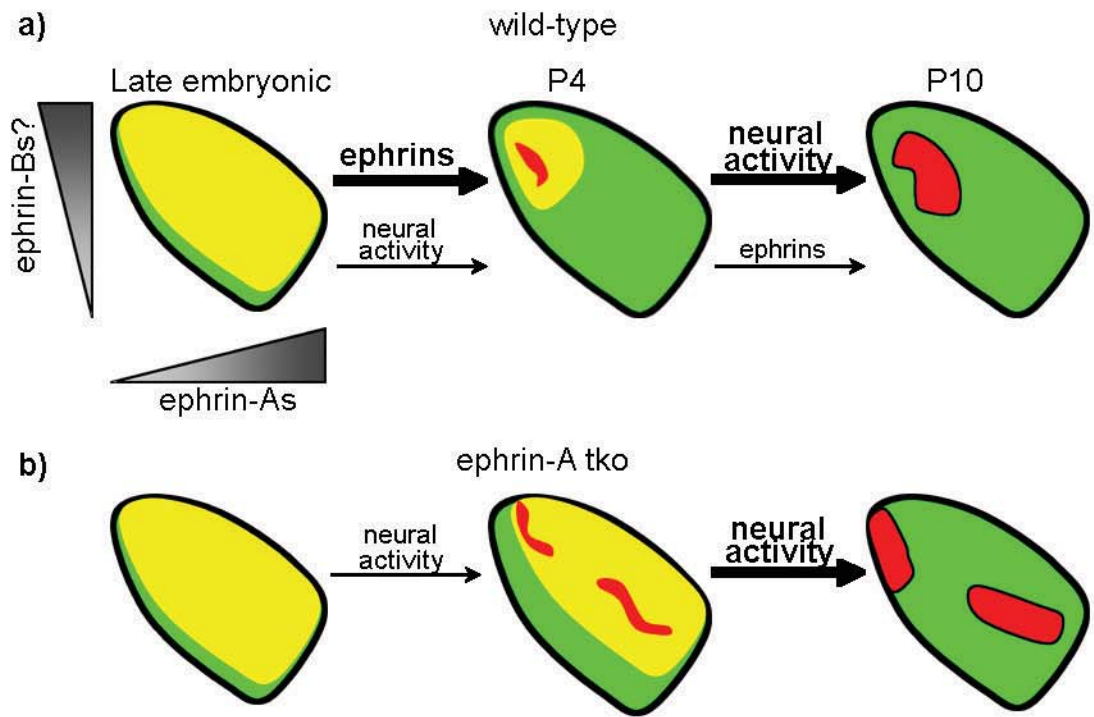

Supplement: NIHMS4845-supplement-supmat4.pdf [file NIHMS4845-supplement-supmat4.pdf]
